# Supplementary material
Source: Springer Nature journal article supplement (https://www.springermedizin.de/resource/supplementary/12965_2006_38_MOESM4_ESM.pdf/9572986)

**a)**

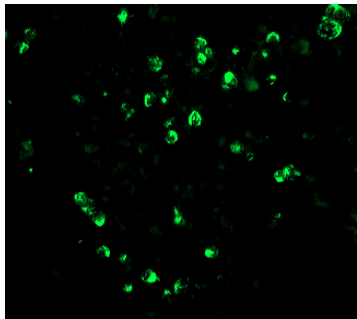

**b)**

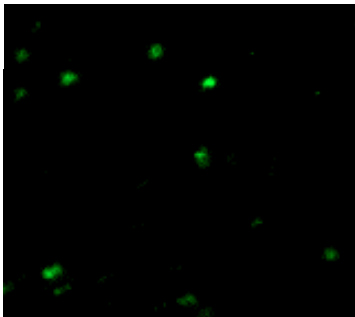

**c)**

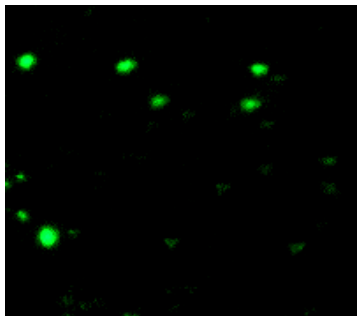

**d)**

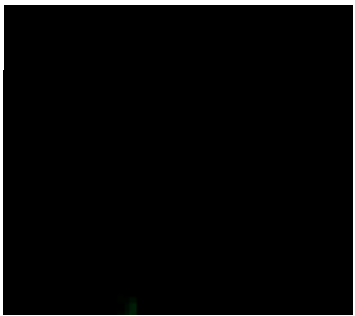

Supplement: MOESM4 [file 9572986]
